# Supplementary material
Source: HighWire-hosted journal article supplement (https://cmajopen-stage.highwire.org/highwire/filestream/81354/field_highwire_adjunct_files/0/2019-0087-1-at.pdf)
Supplement: 2019-0087-1-at.pdf [file 2019-0087-1-at.pdf]

## Appendix 1 (as supplied by the authors): Supplemental material

### Multiple imputation results

Dataset with missing data (for imputation) included 6,445 survey responses. Imputation for 420 missing values (<7% of the full dataset). We imputed data for the following covariates: household education (n=322), race/ethnicity (n=54), immigration (n=31), marital status (n=16).

Supplemental Table S1. Pooled effect estimates for the odds of contraceptives use based on the effect of lower household income using datasets with missing data imputed, from the Canadian Community Health Survey (2009–2010 and 2013–2014).

| <i>Outcome</i>            | <i>Pooled RR</i> | <i>95% CI</i> |
|---------------------------|------------------|---------------|
| Oral contraceptives       | 0.86             | 0.80, 0.92    |
| Injectable contraceptives | 1.68             | 1.00, 2.83    |
| Condoms only              | 1.33             | 1.09, 1.63    |
| Non-users                 | 1.20             | 0.96, 1.51    |
| Condom plus OCs or DMPA   | 0.83             | 0.74, 0.93    |

## Two alternate definitions of household income

The original 5-level categorical variable for household income from the CCHS was also assessed in bivariate and logistic regression models with the outcomes of interest. Further, we refined the household income variable by adjusting for the number of individuals living in the household using the relevant CCHS categorical variable for household size. Because only categorical data was available for both household income and household size, we first created a continuous variable for household income using the midpoint of the range (except for the highest range, which was assigned as \$100,000). Then, we assigned household size based on the categorical variable from the CCHS (1-person household = 1, ... 5-person household = 5). The adjusted per-person household income was calculated based on commonly used approaches: an “equivalence scale”<sup>1,2</sup> adjustment to account for economies of scale in larger households, which would impact a per-person “adjusted household income”. Adjusted household income in this study was calculated as follows:

$$\text{Adjusted household income} = \text{Household income} / (\text{Household size})^{0.5}$$

Descriptive statistics and prevalence estimates for both household income variables are shown in Table S2-1 below. Adjusted and unadjusted logistic regression model estimated odds ratios using the 5-level categorical household income variable and adjusted household income are shown in Table S2-2.

---

<sup>1</sup> Smeeding TM. Poor People in Rich Nations: The United States in Comparative Perspective. *Ssrn*. 2005;20(1):69–90.

<sup>2</sup> Kochhar R, Cohn D. Fighting Poverty in a Bad Economy, Americans Move in with Relatives. Pew Research Center’s Social & Demographic Trends Project. 2011.

Supplemental Table S2-1. Descriptive statistics and population prevalence estimates for contraceptive outcomes by household income and adjusted income among female youth, from the Canadian Community Health Survey (2009–2010 and 2013–2014).

| <i>Income variables</i>                     | <i>Survey responses (N=6025)<sup>†</sup></i><br><i>n</i> | <i>Population estimates (N= 826 711)</i><br><i>n (%)</i> | <i>Oral contraceptives</i><br><i>% (95% CI)</i> | <i>Injectable DMPA</i><br><i>% (95% CI)</i> | <i>Condoms*</i><br><i>% (95% CI)</i> | <i>Non-users</i><br><i>% (95% CI)</i> |
|---------------------------------------------|----------------------------------------------------------|----------------------------------------------------------|-------------------------------------------------|---------------------------------------------|--------------------------------------|---------------------------------------|
| Yearly household income <sup>‡</sup>        |                                                          |                                                          |                                                 |                                             |                                      |                                       |
| None or <\$20,000                           | 681                                                      | 94 298 (11.4)                                            | 48.1 (42.2, 53.9)                               | 4.2 (2.4, 6.0)                              | 19.0 (14.6, 23.5)                    | 19.8 (15.4, 24.1)                     |
| \$20,000–\$39,999                           | 1030                                                     | 143 975 (17.4)                                           | 52.2 (47.2, 57.3)                               | 3.0 (1.4, 4.6)                              | 17.5 (14.0, 21.0)                    | 17.7 (14.0, 21.3)                     |
| \$40,000–\$59,999                           | 1047                                                     | 146 608 (17.7)                                           | 54.5 (49.7, 59.4)                               | 3.4 (1.8, 5.1)                              | 18.2 (14.5, 21.8)                    | 13.7 (10.5, 16.9)                     |
| \$60,000–\$79,999                           | 931                                                      | 131 361 (15.9)                                           | 56.9 (51.4, 62.3)                               | 1.7 (0.6, 2.8)                              | 21.2 (16.3, 26.1)                    | 12.0 (8.7, 15.4)                      |
| \$80,000 or more                            | 2336                                                     | 310 470 (37.6)                                           | 69.0 (66.0, 71.9)                               | 1.5 (0.8, 2.2)                              | 13.3 (11.0, 15.6)                    | 10.5 (8.5, 12.5)                      |
| Household size-adjusted income <sup>§</sup> |                                                          |                                                          |                                                 |                                             |                                      |                                       |
| less than \$20,000 pp <sup>⁵</sup>          | 1159                                                     | 158 009 (19.1)                                           | 45.9 (41.1, 50.6)                               | 4.3 (2.8, 5.8)                              | 20.0 (16.3, 23.6)                    | 21.0 (17.5, 24.5)                     |
| 20–<40k pp                                  | 1888                                                     | 273 599 (33.1)                                           | 56.7 (53.1, 60.3)                               | 2.3 (1.3, 3.3)                              | 17.7 (15.1, 20.4)                    | 14.0 (11.5, 16.6)                     |
| 40–<60k pp                                  | 2696                                                     | 359 083 (43.4)                                           | 65.7 (62.8, 68.6)                               | 1.7 (1.0, 2.4)                              | 15.5 (13.1, 17.9)                    | 10.4 (8.6, 12.2)                      |
| 60k pp or more                              | 282                                                      | 36 021 (4.4)                                             | 71.4 (63.9, 78.8)                               | 2.9 (0.2, 5.7)                              | 9.1 (5.2, 13.0)                      | 10.0 (4.2, 15.9)                      |

\* Includes those reporting usually using only spermicide and/or condoms

† N for this analysis, 6 cases excluded due to missing data for household size

‡ Original yearly household income variable from CCHS

§ Adjusted household income based on household size

⁵ pp = per person

Supplemental Table S2-2. Effect of yearly household income and household size-adjusted income on contraceptives used by female youth (ages 15–24 years), from the Canadian Community Health Survey (2009–10 and 2013–14), adjusted and unadjusted regression models.

| <i>Covariate<br/>(main exposure only)</i> | <i>Oral contraceptives</i>     |                                  | <i>Injectable DPMA</i>       |                                 | <i>Condoms only</i>          |                                 | <i>Non-users</i>             |                                 |
|-------------------------------------------|--------------------------------|----------------------------------|------------------------------|---------------------------------|------------------------------|---------------------------------|------------------------------|---------------------------------|
|                                           | <i>Crude<br/>RR* (95% CI†)</i> | <i>Adjusted‡<br/>RR (95% CI)</i> | <i>Crude<br/>RR (95% CI)</i> | <i>Adjusted<br/>RR (95% CI)</i> | <i>Crude<br/>RR (95% CI)</i> | <i>Adjusted<br/>RR (95% CI)</i> | <i>Crude<br/>RR (95% CI)</i> | <i>Adjusted<br/>RR (95% CI)</i> |
| <b>Model 1:</b>                           |                                |                                  |                              |                                 |                              |                                 |                              |                                 |
| Yearly household income                   |                                |                                  |                              |                                 |                              |                                 |                              |                                 |
| ≥ \$80,000                                | baseline                       | baseline                         | baseline                     | baseline                        | baseline                     | baseline                        | baseline                     | baseline                        |
| \$60,000 – \$79,999                       | 0.82 (0.74, 0.92)              | 0.86 (0.78, 0.96)                | 1.11 (0.51, 2.44)            | 1.05 (0.46, 2.38)               | 1.59 (1.19, 2.12)            | 1.59 (1.20, 2.10)               | 1.14 (0.81, 1.60)            | 1.03 (0.74, 1.45)               |
| \$40,000 – \$59,999                       | 0.79 (0.72, 0.87)              | 0.86 (0.78, 0.95)                | 2.23 (1.14, 4.34)            | 1.97 (1.01, 3.81)               | 1.36 (1.05, 1.78)            | 1.32 (1.01, 1.72)               | 1.30 (0.96, 1.76)            | 1.06 (0.78, 1.44)               |
| \$20,000 – \$39,999                       | 0.76 (0.68, 0.84)              | 0.85 (0.76, 0.94)                | 1.97 (0.99, 3.96)            | 1.74 (0.85, 3.56)               | 1.31 (1.01, 1.71)            | 1.23 (0.93, 1.61)               | 1.68 (1.27, 2.22)            | 1.34 (1.00, 1.81)               |
| None – \$19,999                           | 0.70 (0.61, 0.79)              | 0.81 (0.72, 0.92)                | 2.72 (1.45, 5.08)            | 2.23 (1.15, 4.33)               | 1.43 (1.07, 1.91)            | 1.25 (0.91, 1.71)               | 1.88 (1.40, 2.52)            | 1.48 (1.08, 2.02)               |
| <b>Model 2:</b>                           |                                |                                  |                              |                                 |                              |                                 |                              |                                 |
| Household size-adjusted income            |                                |                                  |                              |                                 |                              |                                 |                              |                                 |
| ≥ \$60,000 or more                        | baseline                       | baseline                         | baseline                     | baseline                        | baseline                     | baseline                        | baseline                     | baseline                        |
| \$40,000 – \$59,999                       | 0.92 (0.82, 1.03)              | 0.89 (0.80, 1.00)                | 0.58 (0.21, 1.61)            | 0.58 (0.21, 1.58)               | 1.71 (1.08, 2.70)            | 1.52 (0.95, 2.45)               | 1.03 (0.56, 1.90)            | 1.07 (0.60, 1.92)               |
| \$20,000 – \$39,999                       | 0.79 (0.70, 0.90)              | 0.83 (0.73, 0.94)                | 0.78 (0.28, 2.21)            | 0.71 (0.25, 1.98)               | 1.95 (1.24, 3.08)            | 1.70 (1.07, 2.71)               | 1.40 (0.76, 2.58)            | 1.26 (0.69, 2.28)               |
| none – \$19,999                           | 0.64 (0.56, 0.74)              | 0.72 (0.62, 0.83)                | 1.46 (0.54, 3.97)            | 1.22 (0.45, 3.26)               | 2.20 (1.38, 3.51)            | 1.75 (1.07, 2.85)               | 2.09 (1.14, 3.85)            | 1.70 (0.94, 3.07)               |

\* Risk ratio

† 95% confidence intervals (CI) using robust standard errors.

‡ Adjusted for: household income, age, race/ethnicity, recent immigrant, student, marital status, household level of education, northern residence

## Stratification by Quebec

To examine whether results may differ in Quebec, we ran all analysis stratified by for the province of Quebec only (n=1278 surveys) compared to all other provinces/territories (n=4747 surveys). Table S3-1 presents the prevalence estimates using weighted populations for all contraceptive outcomes when the survey was stratified by Quebec compared with the rest of Canada. Table S3-2 presents results from regression models predicting risk of contraceptive use in stratified groups.

Supplemental Table S3-1. Stratified for Quebec versus rest of Canada: descriptive statistics and population prevalence estimates for contraceptive outcomes by 2-level household income and adjusted income among female youth, from the Canadian Community Health Survey (2009–2010 and 2013–2014).

| <i>Household income</i> | <i>Surveys</i><br>n | <i>Population estimates</i><br>n (%) | <i>Oral contraceptives</i> | <i>Injectable DPMA</i> | <i>Condoms only</i> | <i>Non-users</i>  |
|-------------------------|---------------------|--------------------------------------|----------------------------|------------------------|---------------------|-------------------|
| Quebec Only             | (n=1278)            | (n= 207 135)                         | 63.1 (59.1, 67.1)          | 1.9 (0.9, 2.9)         | 15.8 (12.8, 18.7)   | 9.2 (6.8, 11.6)   |
| Household income        |                     |                                      |                            |                        |                     |                   |
| higher income group     | 440                 | 70 450 (34.0)                        | 79.2 (74.3, 84.1)          | 1.0 (0.0, 2.0)         | 8.8 (5.4, 12.3)     | 5.4 (2.7, 8.1)    |
| lower income group      | 838                 | 136 685 (66.0)                       | 54.8 (49.6, 60.0)          | 2.4 (0.9, 3.8)         | 19.3 (15.2, 23.4)   | 11.2 (7.9, 14.5)  |
| Rest of Canada          | (n=4747)            | (n=619 576)                          | 57.9 (55.6, 60.2)          | 2.6 (2.0, 3.3)         | 17.2 (15.4, 19.0)   | 15.1 (13.5, 16.7) |
| Household income        |                     |                                      |                            |                        |                     |                   |
| higher income group     | 1896                | 240 020 (38.7)                       | 65.9 (62.5, 69.4)          | 1.7 (0.8, 2.6)         | 14.6 (11.9, 17.4)   | 12.0 (9.5, 14.5)  |
| lower income group      | 2851                | 379 556 (61.3)                       | 52.8 (49.7, 55.8)          | 3.2 (2.3, 4.2)         | 18.8 (16.4, 21.2)   | 17.0 (14.9, 19.2) |

Supplemental Table S3-2. Stratified by Quebec versus rest of Canada: effect of low household income (<80,000\$/year) on contraceptives used by female youth, from the Canadian Community Health Survey (2009–2010 and 2013–2014), adjusted and unadjusted regression models.

| <i>Primary outcomes</i>    | <i>Quebec only</i>                                                       |                                             | <i>Rest of Canada</i>                                       |                                             |
|----------------------------|--------------------------------------------------------------------------|---------------------------------------------|-------------------------------------------------------------|---------------------------------------------|
|                            | <i>Crude RR*<br/>(95% CI)<sup>†</sup></i><br><i>for low income group</i> | <i>Adjusted RR<sup>‡</sup><br/>(95% CI)</i> | <i>Crude RR<br/>(95% CI)</i><br><i>for low income group</i> | <i>Adjusted RR<sup>‡</sup> (95%<br/>CI)</i> |
| Oral contraceptives        | 0.69 (0.62, 0.77)                                                        | 0.75 (0.67, 0.84)                           | 0.8 (0.74, 0.87)                                            | 0.89 (0.82, 0.96)                           |
| Injections (DMPA)          | 2.38 (0.74, 7.68)                                                        | 2.20 (0.71, 6.84)                           | 1.92 (1.07, 3.43)                                           | 1.61 (0.88, 2.94)                           |
| Condoms only               | 2.18 (1.4, 3.41)                                                         | 2.12 (1.35, 3.31)                           | 1.28 (1.02, 1.61)                                           | 1.23 (0.98, 1.55)                           |
| Non-users                  | 2.07 (1.16, 3.69)                                                        | not estimable <sup>§</sup>                  | 1.42 (1.11, 1.8)                                            | 1.14 (0.88, 1.47)                           |
| <b>Multiple methods</b>    |                                                                          |                                             |                                                             |                                             |
| Condom plus OCs or<br>DMPA | 0.67 (0.52, 0.86)                                                        | not estimable <sup>‡</sup>                  | 0.67 (0.58, 0.77)                                           | 0.82 (0.71, 0.94)                           |

\* Risk ratio

<sup>†</sup> 95% confidence intervals (CI) using robust standard errors.

<sup>‡</sup> Adjusted for: household income, age, race/ethnicity, recent immigrant, student status, marital status, household level of education, northern residence (rest of Canada group only)

<sup>§</sup> Model was not estimable for income status due to low cell counts for outcome of interest (household income)

## Addendum to Table 2

Supplemental Table S4. Estimated population prevalence (%) for dual-method use (condoms plus OCs or DMPA), by various covariates, from Canadian Community Health Survey (2009–2010 and 2013–2014). Addendum to Table 2.

| <i>Covariates</i>                                    | <i>Multiple method:<br/>Condom + OCs or DMPA<br/>% (95% CI)</i> |
|------------------------------------------------------|-----------------------------------------------------------------|
| <b>Household income</b>                              |                                                                 |
| <\$80,000/year                                       | 24.5 (22.3, 26.6)                                               |
| ≥ \$80,000/year                                      | 36.6 (33.7, 39.6)                                               |
| <b>Age</b>                                           |                                                                 |
| 15 to 17 years                                       | 42.8 (38.5, 47.1)                                               |
| 18 to 19 years                                       | 33.0 (29.1, 36.9)                                               |
| 20 to 24 years                                       | 25.7 (23.5, 27.8)                                               |
| <b>Race or ethnicity</b>                             |                                                                 |
| White                                                | 31.0 (29.0, 33.0)                                               |
| visible minority                                     | 21.2 (17.6, 24.8)                                               |
| <b>Current student</b>                               |                                                                 |
| no                                                   | 22.6 (20.1, 25.1)                                               |
| yes                                                  | 34.2 (31.8, 36.7)                                               |
| <b>Married or common-law</b>                         |                                                                 |
| no                                                   | 32.0 (30.0, 34.0)                                               |
| yes                                                  | 15.7 (11.8, 19.6)                                               |
| <b>Recent immigrant*</b>                             |                                                                 |
| No                                                   | 29.5 (27.7, 31.3)                                               |
| Yes                                                  | 18.7 (9.8, 27.7)                                                |
| <b>Highest level education – Household</b>           |                                                                 |
| < secondary                                          | 12.6 (7.2, 18.1)                                                |
| secondary grad                                       | 25.2 (20.1, 30.3)                                               |
| some post-sec                                        | 23.3 (18.0, 28.6)                                               |
| post-sec grad                                        | 31.0 (28.9, 33.0)                                               |
| <b>Consulted a doctor or nurse in past 12 months</b> |                                                                 |
| No                                                   | 20.7 (15.8, 25.6)                                               |
| Yes                                                  | 30.3 (28.4, 32.2)                                               |
| <b>Has family doctor</b>                             |                                                                 |
| No                                                   | 21.1 (17.6, 24.7)                                               |
| Yes                                                  | 31.0 (29.0, 33.0)                                               |
| <b>Resident of the northern territories†</b>         |                                                                 |
| No                                                   | 29.1 (27.3, 30.8)                                               |
| Yes                                                  | 20.7 (13.9, 27.6)                                               |
| <b>Quebec‡</b>                                       |                                                                 |
| no                                                   | 29.4 (27.4, 31.5)                                               |
| yes                                                  | 27.8 (24.2, 31.4)                                               |

\* Immigrated to Canada within the last 10 years

† Province of residence was one of the Yukon, Northwest Territories or Nunavut

‡ Quebec has a publicly-funded prescription benefit program; contraceptives are covered for youth who do not have coverage under a private drug plan

## Stratification by living arrangement

Our study population included female youth who lived with their parents (59%), a partner/spouse (12%), partner/spouse and own child/children (5%), or their own child/children (3%). Together, these groups account for 79% of our study population.

On the other hand, household income may be difficult to interpret for those in the “unattached either alone or other or single” living arrangement group (21%), which may include those living with roommates or on their own. To examine the impact of combining these groups in our primary analysis, we conducted a sensitivity analysis with the subgroup of 79% of our study sample excluding the ‘unattached/other’ group. We could not report on the ‘unattached/other’ group directly, because individual cell sizes with this smaller sample do not meet CCHS reporting criteria (20,21). Table S5-1 presents the prevalence estimates using weighted populations for all contraceptive outcomes for a subgroup of our study population who were not in the ‘other’ or ‘unattached alone’ living arrangement group (79%). Table S5-2 presents results from regression models predicting risk of contraceptive use in this subgroup only.

Supplemental Table S5-1. Subgroup excluding those who identified as living arrangement ‘unattached/other or alone’: descriptive statistics and population prevalence estimates for contraceptive outcomes by 2-level household income and adjusted income among female youth, from the Canadian Community Health Survey (2009–2010 and 2013–2014).

|                     | <i>Surveys</i><br>(n=5124)<br>n | <i>Population estimates</i><br>(N= 666 627)<br>n (%) | <i>Oral contraceptives</i><br>% (95% CI) | <i>Injectable contraceptives</i><br>% (95% CI) | <i>Condoms only</i><br>% (95% CI) | <i>Non-users</i><br>% (95% CI) |
|---------------------|---------------------------------|------------------------------------------------------|------------------------------------------|------------------------------------------------|-----------------------------------|--------------------------------|
| Household income    |                                 |                                                      |                                          |                                                |                                   |                                |
| higher income group | 2249                            | 295 964 (44.4)                                       | 69.1 (66.1, 72.1)                        | 1.4 ( 0.7, 2.1)                                | 13.2 (10.9, 15.5)                 | 10.7 ( 8.6, 12.8)              |
| lower income group  | 2875                            | 370 663 (55.6)                                       | 52.3 (49.3, 55.2)                        | 2.9 ( 2.0, 3.7)                                | 18.4 (16.1, 20.7)                 | 17.0 (14.8, 19.2)              |



Supplemental Table S5-2. Subgroup excluding those who identified as living arrangement ‘unattached/other or alone’: effect of low household income (<80,000\$/year) on contraceptives used by female youth, from the Canadian Community Health Survey (2009–2010 and 2013–2014), adjusted and unadjusted regression models.

|                         | <i>Subgroup excluding ‘unattached/other or alone’ living arrangements</i> |                                  |
|-------------------------|---------------------------------------------------------------------------|----------------------------------|
| <i>Primary outcomes</i> | <i>Crude RR*<br/>(95% CI†)</i>                                            | <i>Adjusted RR‡<br/>(95% CI)</i> |
|                         | <i>for low income group</i>                                               |                                  |
| Oral contraceptives     | 0.76 (0.7, 0.81)                                                          | 0.83 (0.77, 0.89)                |
| Injections (DMPA)       | 2.09 (1.15, 3.79)                                                         | 1.75 (0.95, 3.21)                |
| Condoms only            | 1.39 (1.12, 1.73)                                                         | 1.39 (1.12, 1.73)                |
| Non-users               | 1.59 (1.26, 2.01)                                                         | 1.28 (0.99, 1.64)                |
| <b>Multiple methods</b> |                                                                           |                                  |
| Condom plus OCs or DMPA | 0.64 (0.57, 0.73)                                                         | 0.80 (0.70, 0.91)                |

\* Risk ratio

† 95% confidence intervals (CI) using robust standard errors.

‡ Adjusted for: household income, age, race/ethnicity, recent immigrant, student status, marital status, household level of education, northern residence

## **CCHS contraception/sexual behaviors variables**

The following CCHS variables were used to define the study population and for the outcomes of interest. Variables were recoded/recategorized as described in the methods section. SXB\_09 (“It is important to me to avoid getting pregnant right now?”); SXB\_1 (“Have you ever had sexual intercourse?”); SXB\_11 (“In the past 12 months, did you and your partner usually use birth control?”); (“What kind of birth control did you and your partner usually use?”) SXB\_12A, SXB\_12B, SXB\_12C, SXB\_12D, SXB\_12E, SXB\_12F (condom (male or female), pill, diaphragm, spermicide or foam, injection, other).
